# Supplementary material for: Isobutanol production by combined in vivo and in vitro metabolic engineering
Source: PubMed Central journal article supplement — Metab Eng Commun. 2022 Oct 23;15:e00210. doi: 10.1016/j.mec.2022.e00210 (PMC9619177; doi:10.1016/j.mec.2022.e00210), 2022-10-23
Supplement: mmc1.pdf [file mmc1.pdf]

BspQI  
 SapI  
 MscI  
 GGCAAAGCCTTTGCGTGCGGTGGCAGTTGACGGGGTATCTGCTGCCTGGCCATGAGAGGAAGAGCGGCGGACAGCAACAACAAGACGTTGGTGAAACGAAA  
 CCGTTTCGGAACGCACGCCACCGTCAACTGCCCATAGACGACGCGACCGGACTCTCCTTCTCGCCCGCGTGTGTTGTTCTGCAAAACCACTTTTGCTTT  
 >> SS9\_upstream H <<<

540 550 560 570 580 590 600 610 620 630 640

ATTCcatGCAAAATGCTCCGGTTTCATGTCATCAAAATGATGACGTAATTAAGCATTGATAATTGAGATCCCTCTCCCTGACAGGATGATTACATAAATAATAGTGA  
 TAAGgtaCGTTTTACGAGGCCAAAGTACAGTAGTTTTACTACTGCATTAATTCGTAAGTAACTCTAGGGAGAGGGACTGTCTACTAATGTATTATTACT  
 >> SS9\_upstream H <<<

650 660 670 680 690 700 710 720 730 740

CAAAAATAAATTTTTATTTATTCAGAAAATGAATTGAAAAATCAGGAGAGCGTTTTCAATCCTACCTCTGGCGCAGTTGATATGTcaaaCAGGTaatcaaccatc  
 GTTTTTATTAATAAATAAATAGGCTTTTTACTTAACCTTTTAGTCTCTCGAAAAGTTAGGATGGAGACCGCTCAACTATACgtttGTCCAttagtgggtag  
 >> SS9\_upstream H <<<

750 760 770 780 790 800 810 820 830 840 850

aaccacctgCGGacagacaatctggtctgtaataatgtgtggagtcaataaaggcatataaaaggaggttaataacatgaaagttaaagtaaacatcttaacatg  
 ttggtggaacccctgtctgttagaccagacatattacacacctcagttattccgatatatttccccaattatgtactttcaatttcatttttagaattagtagt  
 >> Promoter <<< BCD\_apFAB886 <<<

860 870 880 890 900 910 920 930 940 950 960

cccggaggcttctaagtgtgacaaaagcaaaaagaacaaaaatccctgtgaaaaacagagggggcggagcttgttgttgattgcttagtgagcaagggtgca  
 gggccctccgaaagattacaactgttttctgtgttttctgttttagggaacacttttctccccgcctgcaacaacaactaacgaatcacctcgttccacag  
 >> BCD\_a...B886 <<< alsS <<<

970 980 990 1,000 1,010 1,020 1,030 1,040 1,050 1,060 1,070

AflIII  
 PciI  
 cacatgtatttggcattccagggtcaaaaatgatgcggtatttgacgctttacaagataaaggacctgaaattatcgttgcggcagcaaaaaacgcagcattc  
 gtgtacataaacgtaaggtccacgttttactacgccataaacgcaaatgttctatttctcggactttaatagcaacgggctgtgttttgcgtcgtgtaag  
 >> alsS <<<

1,080 1,090 1,100 1,110 1,120 1,130 1,140 1,150 1,160 1,170

EagI  
 StuI  
 atggccaagcagtcggccgttaactggaaaaccgggagtcggttagtcacatcaggaccgggtgcctctaactggcaacagcctgtgacagcaaacactga  
 taccgggttcgtcagccgcaaatgaccttttggccctcagcacaatcagtgtagctcggcccagggagattgaaccgttgcggcagcactgtcgttgtgact  
 >> alsS <<<

1,180 1,190 1,200 1,210 1,220 1,230 1,240 1,250 1,260 1,270 1,280

Tth111I  
 PflFI  
 aggagaccctgtcgttgcgcttgcgaaactgatccgtgcagatcgtttaaaacggacacatcaatcttggataatgCGGCGctattccagccgattacaaaat  
 tcctctgggacagcaacgcgaacaccttgcactaggcagcttagcaaatttgcctgtgttagtaaacctattacccgcgataaggctcggctaagtttta  
 >> alsS <<<

1,290 1,300 1,310 1,320 1,330 1,340 1,350 1,360 1,370 1,380 1,390

NsiI  
 acagtgtagaagtcaagatgtaaaaaatataccggaagctgttacaatgcattttaggatagcgtcagcaggcaggctggggccgcttttgtgagcttccgcaa  
 tgtcacatcttcaagttctacatTTTTATATggccttcgacaatgtttacgtaaatctatcgagctgtcccgtccgaccggcgaaaacactcgaaggcgtt  
 >> alsS <<<

1,400 1,410 1,420 1,430 1,440 1,450 1,460 1,470 1,480 1,490

gatgttgaatgaagtacacaatacgaaaaacgtgcgtgctgttgcagcgccaaaactcggctctgcagcagatgatgcaatcagtcggccatagcaaaaatcca  
ctacaacacttacttcagtgtttatgcttttgcacgcacgacaacgtcgcggtttgagccaggacgctctactacgttagtcacgccggtatcgttttaggt

alsS

1,500 1,510 1,520 1,530 1,540 1,550 1,560 1,570 1,580 1,590 1,600

BbsI

aacagcaaaacttctgtcgttttggcggcatgaaaggcggagaccggaagcaatataagcggctcgcaagctttgaaaaaggttcagcttccattgttgaaa  
ttgtcgtttgaaagacagcaaaaccagccgtactttccgcttctgccttcgtaatttcgcaagcgttcgaaaacttttccaagtcgaagtaacaacttt

alsS

1,610 1,620 1,630 1,640 1,650 1,660 1,670 1,680 1,690 1,700 1,710

KpnI

Acc65I

XbaI

catatcaagctgccgtaccctttctagagatttagaggatcaatatttggccgtatcggtttgttccgcaaccagcctggcgatttactgctagagcaggcagat  
gtatagttcgacggccatgggaaagatctctaaatctcctagtataaaaaccggcatagccaaacaaggcgttggcggaccgctaaatgacgatctcgtccgtcta

alsS

1,720 1,730 1,740 1,750 1,760 1,770 1,780 1,790 1,800 1,810

gtgttctgcagatcggtatgaccggatgaaatgatccgaaattctggaatatcaatggagaccggacaattatccatttagacgagattatcgtgacattga  
caacaagactgctagccgatactgggctaacttatactaggctttaaagacctatagttacctctggcctgttaataggtaaatctgctctaatacgactgtaact

alsS

1,820 1,830 1,840 1,850 1,860 1,870 1,880 1,890 1,900 1,910 1,920

AhdI

tcagcttaccagcctgatcttgaattgatcggtgacattccgtccacgatcaatcatatcgaacacgatgctgtgaaagtggaatttcagagcgtgagcagaaaa  
agtacgaatggcggactagaacttaactagccactgtaaggcaggtgctagttagtagcttctgctacgacactttcacctaaacgtctcgactcgtctttt

alsS

1,930 1,940 1,950 1,960 1,970 1,980 1,990 2,000 2,010 2,020 2,030

NsiI

tccttctgatttaaaacaatatatgcatgaaggtagcaggtgcctgcagattggaaatcagacagagcgcaccctcttgaatcgttaaagagtgcgtaatgca  
aggaaagactaaatttgttatatactacttccactcgtccacggacgtctaacccttagtctgctcgcgtgggagaacttagcaatttctcaacgattacgt

alsS

2,040 2,050 2,060 2,070 2,080 2,090 2,100 2,110 2,120 2,130 2,140

gtcgatgatcatgttacagtaacttgcgatatcggttcgcacgccatttggatgtcacgttatttcgcagctacgagccgttaacattaatgatcagtaacggat  
cagctactagtagcaatgtcattgaacgctatagccaagcgtgcgtaaacctacagtgcaataaaggcgtcgtatgctcggaattgtaattactagtcattgccata

alsS

2,150 2,160 2,170 2,180 2,190 2,200 2,210 2,220 2,230 2,240

gcaaacactcggcgttgcgcttccttgggcaatcggcgcttcattgggtaaaccgggagaaaaagtggtttctgtctctggtgacggcggtttcttattctcagcaa  
cgtttgtagccgcaacgcgaaggaaccgcttagcccggaagtaaccactttggccctctttttcaccaagacagagaccactgccccaaagaataagatcgtt

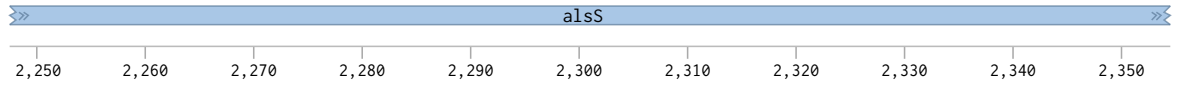

tggaattagagacagcagttcgcactaaagcaccaattgtacacattgtatggaacgacagcacatatgacatgggtgcatccagcaattgaaaaataaacgt  
acctaatctctgtcgtcaagctgatttctgggtaacatgtgtaacataccttgcctgtctgtatactgtaccaacgtaaggctgtaactttttatattggca

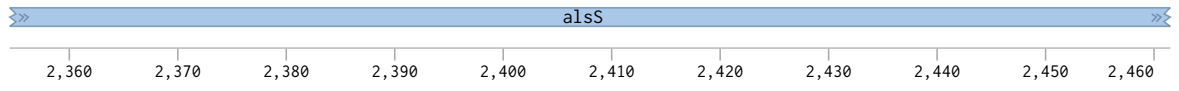

acatctcggctcgatttcgaaatcgcatacgtgaaatcgcgaaagcttcggagcaactggcttgcgctagaatcaccagaccagctggcagatgttctgcg  
ttagacgccagctaaagcctttatagctatagcactttatacgcctttcgaagcctcgttgaccgaacgcgcatcttagtggtctggctcagcgtctacaagacg

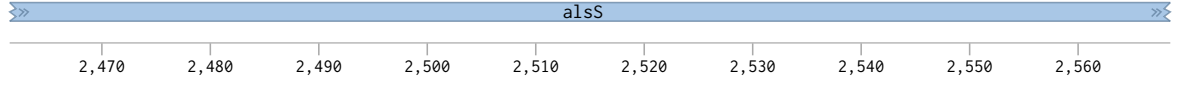

tcaaggatgaacgctgaaggtcctgtcatcatcgatgtcccgggtgactacagtgataacattaattagcaagtgacaagctccgaaagaatcggggaactca  
agtccgacttgcgactccaggacagtagtagctacagggccaactgatgtcactattgtaataaatcgttcactgttcgaagcctttcttaagcccttgagt

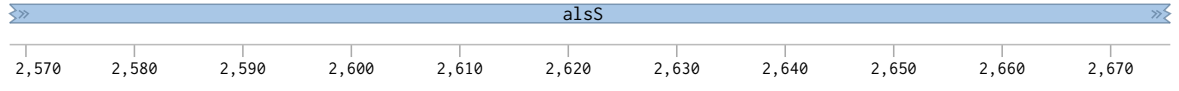

tgaaaacgaaagctctctagaagcaagctgataaacgatacaataaaggctccttttggagcctttttttggagattttcaacatgaaaaattattattac  
acttttgcttgcgagatcttctgctcactatttggctatgttaattccgaggaacacctcggaaaaaaaaaacctctaaaagttgacttttttaataataatg

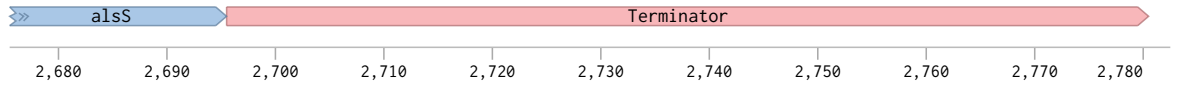

ggcccggggagagcactaacgctgcataacctcgttcgctgccacctaagaatactctacggctcacatacttgacaaacagacaatctggctgtaagttgtgtgga  
ccgggcccctctcgtgattgcgacgtattggagcaacgcgaggtggattcttatgagatgccagtgatgaactgtttgtctgttagaccagacattcaacacacct

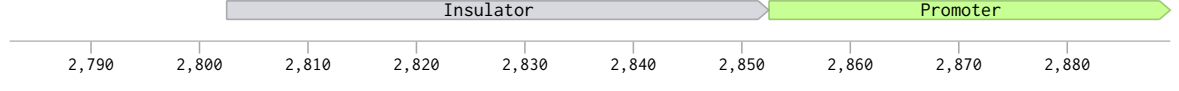

gaccagaggaaggaggaacaaccatgcgagtggtgaagaaacatcttaatcatgcacaggagacttctaattggctaaacttcaatacactgaatctgcgcca  
ctggtctccattctccattgttggtagcctcacaactctttgtagaattagtagctgtcctctgaaagattaccgattgtagaagttatgtgacttagacgcggt

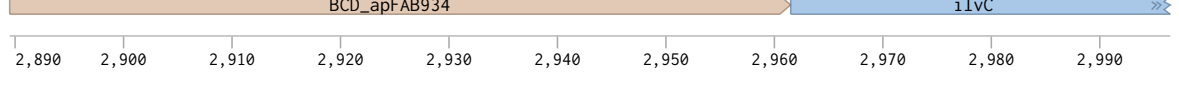

gcagctggcacagctgggcaaatgtcgctttatgggcccgcgatgaattcggcgatggcgcgagctacctcagggtaaaaaagtatcatcgtcggctgtggcgcac  
cgtcgaccgtgtcgaccgtttacagcgaatacccggcgtacttaagcggctaccgcgctcgatggaagtcaccatttttcatcagtagcagccgacaccgcgtg

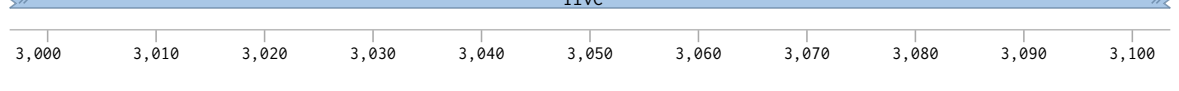

agggtctgaaccaggcctgaacatgctgtattctgtctcgatatctctacgctctgctaaagaagcgattgccgagaagcgcgctcctggcgtaaagcgacc  
tcccagacttggctccggacttgtacgcactaagaccagagctatagaggatgagagcgacatttcttcgctaaccggctcttcgcgccaggaccgacatttcgctgg

» ilvC «

3,110 3,120 3,130 3,140 3,150 3,160 3,170 3,180 3,190 3,200 3,210

gaaaatggttttaaagtggtacttacgaagaactgatcccacaggcggatctgggtgataacctgacgcccggacaagcagcactctgatgtagtgcgcaccgtaca  
ctttacaaaatttaccatgaatgcttcttgactagggttccgcctagaccactaatggactgcgccctgttcgtcgtgagactacatcacgctggcatgt

» ilvC «

3,220 3,230 3,240 3,250 3,260 3,270 3,280 3,290 3,300 3,310

FspAI  
FspI

gccactgatgaaagacggcgccgctgggctactcgcacggttcaacatcgtcgaagtggcgagcagatccgtaaagatataccgtagtgatggttggccga  
cggtagctactttctgccgcccgcacccgatgagcgtgccaagtgttagcagcttccccctcgtctaggcatttctatagtgcatcactaccaacggcct

» ilvC «

3,320 3,330 3,340 3,350 3,360 3,370 3,380 3,390 3,400 3,410 3,420

aatcccaggcaccgaagtgcgtgaagagtacaacgtgggttcggcgtaccgacgctgatggcgttccccgaaaacgatcccgaaggcgaagcatggcatt  
ttacgggtccgtgcttcacgcacttctcatgtttgcaaccaagccgatggctcgcactaacggcaagtggccttttgctaggcttccgctccgtaccgctaa

» ilvC «

3,430 3,440 3,450 3,460 3,470 3,480 3,490 3,500 3,510 3,520 3,530

gccaaagcctggcgccgctgcaaccggtggtcacctgctgggttgcgtggaatcgtccttcgttgcggaagtgaatctgacctgatggcgagcaaacctcctgtg  
cggtttcggaccgcccagcttggccaccagtggcagccacacgaccttagcaggaagcaacgccttcaacttagactggactaccgctcgtttggtaggacac

» ilvC «

3,540 3,550 3,560 3,570 3,580 3,590 3,600 3,610 3,620 3,630

AgeI

cggtatgttcaggctggctctctgctgtgcttcgacaagctgggtggaagaaggtaccgatccagcatacgcagaaaaactgattcagttcggttggaaaccatca  
gccatacaacgtccgaccgagagacgacacgaagctgttcgaccaccttctccatggctaggctcgtatgcgtctttttagactaagtcaagccaacctttggtagt

» ilvC «

3,640 3,650 3,660 3,670 3,680 3,690 3,700 3,710 3,720 3,730 3,740

KpnI  
Acc65I

ccgaagcactgaaacaggcggcatcaccctgatgatggaccgtctcttaaccggcgaactgctgcttatgcgcttctgaacagctgaaagagatcatggca  
ggcttcgtgactttgtcccgcctagtgggactactacctggcagagagattggccgctttgacgcacgaatacgggaagacttgcgacttctctagtaccgt

» ilvC «

3,750 3,760 3,770 3,780 3,790 3,800 3,810 3,820 3,830 3,840 3,850

Esp3I  
BsmBI

ccctgttcagaaacatattggacgacatcatctccggcgaattctctccggatgatggcggactgggccaacgatgataagaaactgtgacctggcgtgaaga  
ggggacaaggctttgtataacctgctgtagtagggccgcttaagagaaggccatactaccgcctgacccggttgctactattctttgacactggaccgacttct

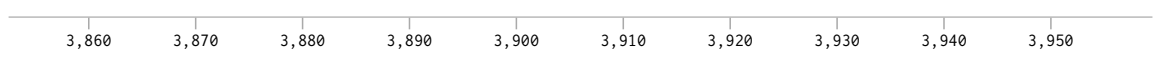

gaccggcaaacccgctttgaaacccgcccagatgaaggcaaatcgccgagcaggagtacttcgataaaggcgtactgatgattgcatggtgaaagcggg  
ctggccgttttggcgcaaaccttggcgcgctcatacttccgttttagccgctcgtcctcatgaagctatttccgcatgactactaacgctaccatttccccc

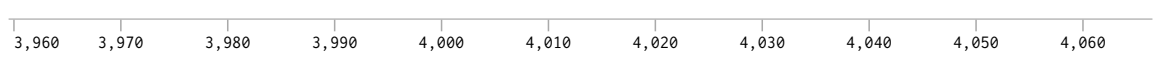

ttgaactggcgttcgaaacatggtcgattccggcatcatgaagagtctgcatattatgaatcactgcacgagctgccgctgattgccaacacatcgcccgaag  
aacttgaccgcaagccttggtagaccgtaagccgtagtaacttctcagactataaacttagtgactgctcgcagcggcactaacggttggttagcgggcatc

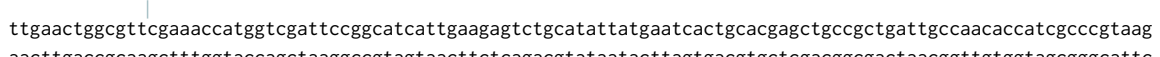

cgctgtacgaaatgaactgggtatctctgataccgctgagtacgtaactatctgttctcttacgcttggtgcccgttgctgaaaccgtttatggcagagctga  
gcagacatgcttacttgaccaatagagactatggcgactcatgccattgtagacaagagaatgcgaacacacggcaacgacttggcaaataccgtctcgact

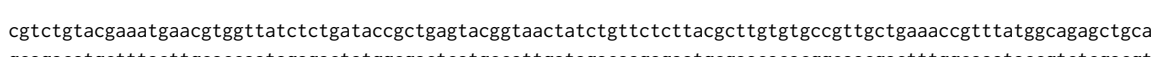

accggcgacactgggttaaagctattccggaaggcggtagataaacggcaactcgctgatgtaacgaagcattcgacgcatcgattgagcaggtaggtaaga  
tggcccgtggaccatttcgataaggccttccgcccattctatgccgctgactacacttgcttcgtaagcgtcggtagcctaactcgtccatcattct

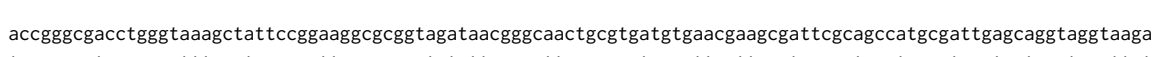

aactgcgggctatatgacagatatgaaacgtattgctgttgcgggttaatagagatcaagccttaacgaactaagacccccgaccgaaaggccgggggttttt  
ttgacgcccgatatactgtctatactttgcataaacgacaacccaattatctctagttcggaaattgcttgattctggggcgctggcttccaggccccaaaaa

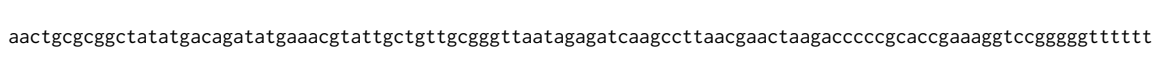

ttgacctaaaaacataaccgaggagcagacaatccgggcatgctcttattgagctgcataacctgacctcctgccagcaatagtaagacaacacgcaaagtctt  
aactggaattttgtattggctcctgctgcttaggcccgtacgcgagataaactcgacgtattggactggaggacggtcgttatcattctgttgtgctttcagaa

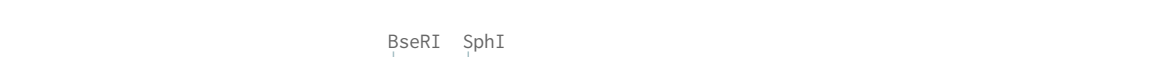

gaaaaacagacaatctggctgtagtattgttggaaatagcctaaaggagggaattatgagagtcttggttaaacataacgaaaaaaaggggaagccgtgtaatgc  
ctgtttgctgttagaccagacatcataaaccttattcggatttctcccttaatacttcaagaccaattgtattgctttgtttcccttcggcacattacg

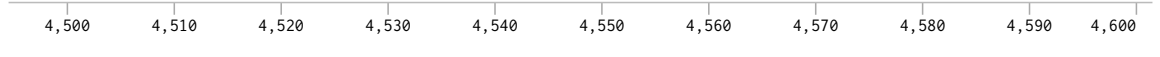

gaaaaacagacaatctggctgtagtattgttggaaatagcctaaaggagggaattatgagagtcttggttaaacataacgaaaaaaaggggaagccgtgtaatgc  
ctgtttgctgttagaccagacatcataaaccttattcggatttctcccttaatacttcaagaccaattgtattgctttgtttcccttcggcacattacg

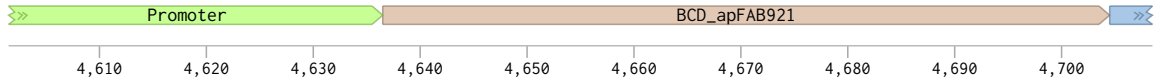

ctaaagtaccgttccgccaccaccactcatggctgtaatatggcgggtgctcgtgcgctgtggcgcgccaccggaatgaccgacgcccgtttcggtaagccgattatc  
gattcatggcaaggcgggtgggtgagtaccagcattataccgccacgacgacgacaccgcgcggtggccttactggctgcggttaaagccattcggctaataag  
>> ilvD >>

4,710 4,720 4,730 4,740 4,750 4,760 4,770 4,780 4,790 4,800 4,810

gcggttgtgaactcgttcaccaatttgtaccgggtcacgtccatctcgcgatctcggtaaacggctgccgaacaaatgaagcggctggcggcgttgccaaaga  
cgccaacacttgagcaagtggttaaacaatggcccagtgacggtagacgctagaccatttgaccagcggctgtttaacttcgccaccgcccaacgggttct  
>> ilvD >>

4,820 4,830 4,840 4,850 4,860 4,870 4,880 4,890 4,900 4,910 4,920

BstXI  
gttcaacaccattcgggtggatgatgggattgccatggccacgggggatgctttattcactgccatctcgcgaactgatcgtgattccgttgagtatatgggtca  
caagttgtgtaaccacactactacctaaccgtaccgggtccccctacgaataagtgcggttagagccttgactagcgactaaggcaactcatataccagt  
>> ilvD >>

4,930 4,940 4,950 4,960 4,970 4,980 4,990 5,000 5,010 5,020

acgccactgcgccgacccatggctctcatcttaactgcgacaaaatcacccggggatgctgatggcttccctgcgcctgaatattccggtgatcttggtttc  
tgccgggtgacgcccgtcgggtaccagacgtagagattgacgctgttttagtggggcccctacgactaccgaaggacgaggacttataaggccactagaacaaagg  
>> ilvD >>

5,030 5,040 5,050 5,060 5,070 5,080 5,090 5,100 5,110 5,120 5,130

ggcgcccgatggaggccgggaaaccaaactttccgatcagatcatcaagctcgcctggttgatgcatgacccaggcgcagaccgaaagtatctgactccca  
ccgccgggtacctccggccctttgggttgaaggctagtctagtagttcagctagaccaactacgctactaggtcccgcctggtgcttcatagactgagggt  
>> ilvD >>

5,140 5,150 5,160 5,170 5,180 5,190 5,200 5,210 5,220 5,230 5,240

PfoI  
gagcgtcaggttgaacttccgctgtccgacctcgggttctgctcgggatggttaccgctaactcaatgaactgcctgaccgaagcgtggcctgtcgcagc  
ctcgtagccaacttgcaaggcgcacaggctggacccaaggacgagccctacaaatggcgattgagtacttgacggactggcttcgcgacccggacagcgtc  
>> ilvD >>

5,250 5,260 5,270 5,280 5,290 5,300 5,310 5,320 5,330 5,340 5,350

cgggcaacggctcgtcgtggcaaccacgccagcctaagcagctgttcttaagtggtaaacgcatgttgaattgaccaaacttattacgagcaaacgac  
gcccgttgccgagcgcagaccgttgggtgcccgtggcattcgtcgacaaggaattacgaccatttgcgtaacaacttaactggtttgcaataatgctcgtttgctg  
>> ilvD >>

5,360 5,370 5,380 5,390 5,400 5,410 5,420 5,430 5,440 5,450

ApaI BstXI  
gaaagtgcactgccgcgtaatatcgccagtaaggcggcgtttgaaaacgcatgacgctggatatcgcgatgggtggatcgactaacaccgtacttcacctgctggc  
ctttcacgtgacggcgattatagcggctattccgcccaaaccttttcgggtactgacacattatagcctaccacactagctgattgtggcatgaagtggacgaccg  
» ilvD »  
5,460 5,470 5,480 5,490 5,500 5,510 5,520 5,530 5,540 5,550 5,560

ggcggcgcaggaagcggaaatcgacttcacatgagtgatatacgataagctttcccgaaggtccacagctgtgtaaagttgcgccgagcaccagaaataccata  
ccgccgctccttcgcctttagctgaagtggactcactatagctattcgaaagggcgtccaaggtgtcgacacattcaacgcggctcgtgggtctttatggtat  
» ilvD »  
5,570 5,580 5,590 5,600 5,610 5,620 5,630 5,640 5,650 5,660 5,670

tggaagatgttcaccgtgctgggtggtttatcggtattctcggcgaactggatcgcgcggggttactgaaccgtgatgtaaaaacgtacttggcctgacgttggc  
accttctacaagtggcagcaccaccacaatagccataagagccgcttgacactagcgcgcccaatgacttggcactacacttttgcataaacggactgcaacggc  
» ilvD »  
5,680 5,690 5,700 5,710 5,720 5,730 5,740 5,750 5,760 5,770

SbfI  
caaacgctggaacaatacagcgttatgctgaccaggatgacgcggtaaaaaatatgttccgcgcaggctctgcaggcattctgacacacaggcattctcgcaaga  
gtttgacgacctgttatgctgcaatcagactgggtcctactgcccattttttatacaaggcgcgtccaggacgtccgtaagcattggtgtcctgtaagagcgttct  
» ilvD »  
5,780 5,790 5,800 5,810 5,820 5,830 5,840 5,850 5,860 5,870 5,880

ttgccgttgggatacgtggacgacgatcgcccaatggctgtatccgctcgttggaaacacgcctacagcaaacgagcggcctggcgtgctctacgtaactttg  
aacggcaaccctatgcgacctgctgctagcgcggttaccgacataggcagcgcaccttggcggatgctgtttctgccgccgaccgccagatgccattgaaac  
» ilvD »  
5,890 5,900 5,910 5,920 5,930 5,940 5,950 5,960 5,970 5,980 5,990

cggaaaacggctgcatcgtgaaaacggcaggcgtcgatgacagcatcctcaaatcaccggcccggcgaagtgtacgaaagccaggacgatcggtagaagcgatt  
gcctttgccgacgtagcactttgcccgtccagctactgctgtaggagtttaagtgccggcggcgtttcacatgctttcggctcgtacgccatcttcgctaa  
» ilvD »  
6,000 6,010 6,020 6,030 6,040 6,050 6,060 6,070 6,080 6,090

RsrII  
ctcggcggtaaagtgtcgccggagatgtggtagtaattcgctatgaagcccgaaggcgtccggggatgcaggaaatgctctaccaaccagttcctgaaatc  
gagccgccatttcaacagcggcctctacacatcattaagcgatactccgggctttccgccaggcccctacgtcctttacgagatgggttggcgaaggactttag  
» ilvD »  
6,100 6,110 6,120 6,130 6,140 6,150 6,160 6,170 6,180 6,190 6,200

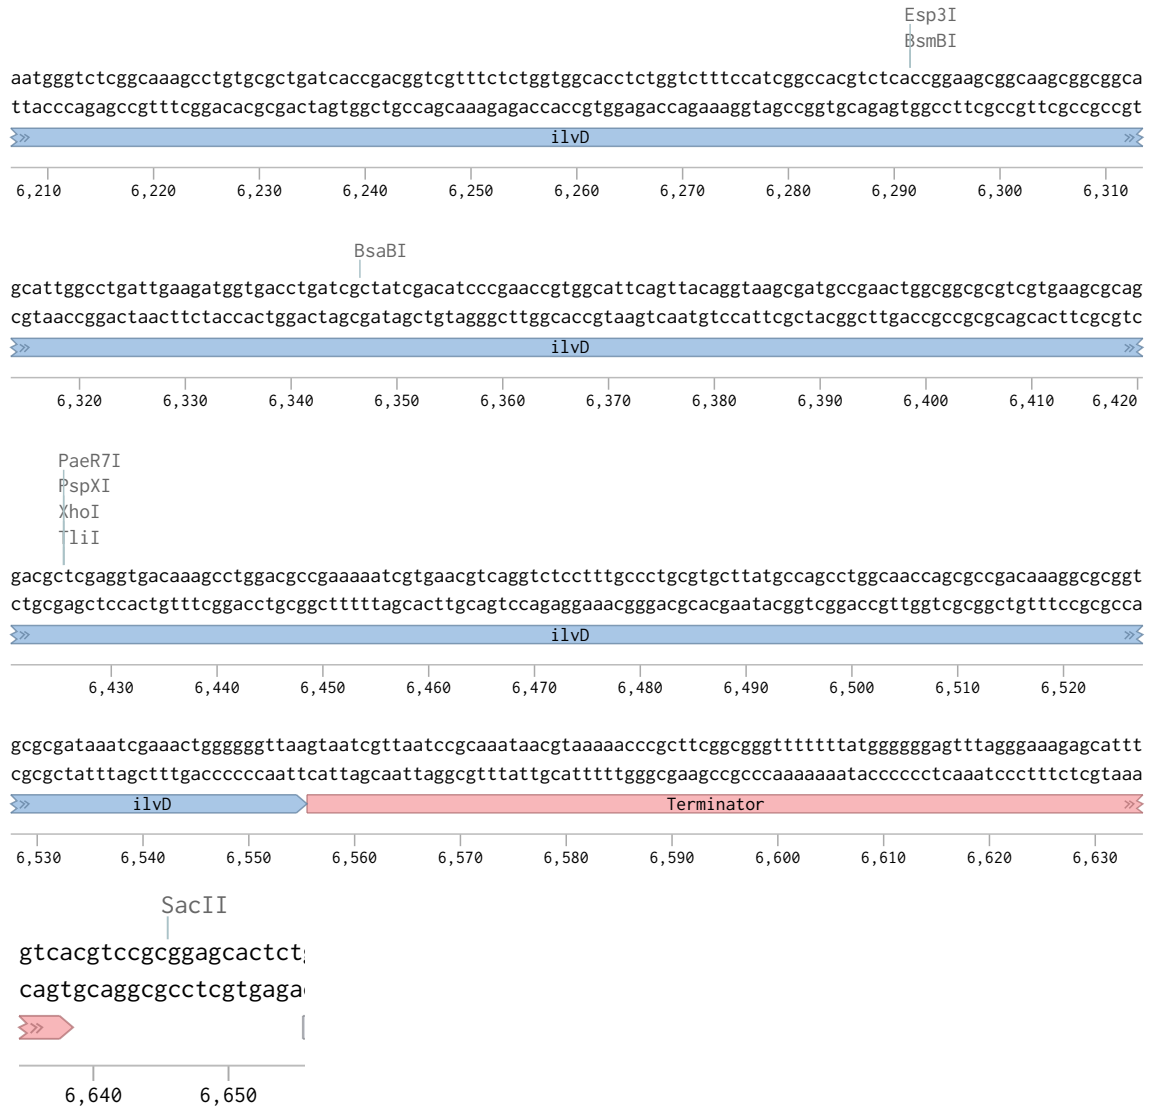

TTATTATATCGCGTTGATTATTGATGCTGTTTTAGTTTTAACGGCAATTAATATATGTGTTATTAATTGAATGAAT  
 AATAATATAGCGCAACTAATAACTACGACAAAAATCAAATGCCGTTAATTATATACACAATAATTACTTACTTA

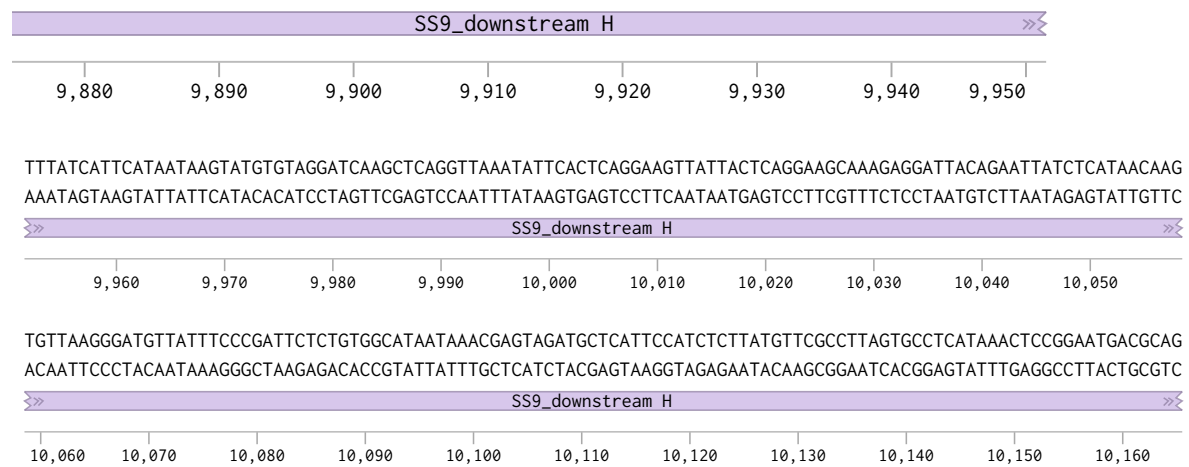

Supplementary Fig. 1 Sequence information of integrated region showing genes with promoter, BCD (RBS), terminator and insulator.
